# Supplementary material for: Associations between Long-Term Air Pollutant Exposures and Blood Pressure in Elderly Residents of Taipei City: A Cross-Sectional Study
Source: PubMed Central journal article supplement (PMC4529013; doi:10.1289/ehp.1408771), 2015-03-20
Supplement: ehp.1408771.s001.acco.pdf [file ehp.1408771.s001.acco.pdf]

**Note to Readers:** *EHP* strives to ensure that all journal content is accessible to all readers.

However, some figures and Supplemental Material published in *EHP* articles may not conform to 508 standards due to the complexity of the information being presented. If you need assistance accessing journal content, please contact [ehp508@niehs.nih.gov](mailto:ehp508@niehs.nih.gov). Our staff will work with you to assess and meet your accessibility needs within 3 working days.

## **Supplemental Material**

### **Associations between Long-Term Air Pollutant Exposures and Blood Pressure in Elderly Residents of Taipei City: A Cross-Sectional Study**

Szu-Ying Chen, Chang-Fu Wu, Jui-Huan Lee, Barbara Hoffmann, Annette Peters, Bert Brunekreef, Da-Chen Chu, and Chang-Chuan Chan

#### **Table of Contents**

**Table S1.** Summary of the statistics for land use variables of the exposure modelling for six air pollutants.

**Table S2.** Spearman correlation coefficients for air pollutants and the total lengths of major roads in 25, 50, 100, and 500 buffer zones.

**Table S3.** Associations of systolic and diastolic blood pressures with an interquartile range increment of particulate matter and nitrogen oxides.

**Table S4.** Subgroup analyses for associations of systolic and diastolic blood pressures with increments of annual averages of particulate matter and nitrogen oxides stratified by physician-diagnosed hypertension.

**Table S1.** Summary of the statistics for land use variables of the exposure modelling for six air pollutants.

| Air pollution                | Land use equation                                                                                                                                                                                                                                                                                                                           | R <sup>2</sup> of model | R <sup>2</sup> validation | RMSE (validation)                     | Number of sites | Measured concentration                                       |
|------------------------------|---------------------------------------------------------------------------------------------------------------------------------------------------------------------------------------------------------------------------------------------------------------------------------------------------------------------------------------------|-------------------------|---------------------------|---------------------------------------|-----------------|--------------------------------------------------------------|
| PM <sub>10</sub>             | 34.41 + 3.41 × 10 <sup>-2</sup> × road area, 50 m + 1.10 × 10 <sup>-4</sup> × industrial area, 5000 m + 2.46 × 10 <sup>-5</sup> × commercial area, 1000 m + 1.16 × 10 <sup>-3</sup> × construction area 100 m                                                                                                                               | 0.87                    | 0.74                      | 3.05 µg/m <sup>3</sup>                | 20              | 48.6 ± 5.9<br>[39.2 - 64.0]<br>µg/m <sup>3</sup>             |
| PM <sub>2.5-10</sub>         | 13.88 + 1.20 × 10 <sup>-6</sup> × industrial area, 5000 m + 2.23 × 10 <sup>4</sup> × inverse distance squared to the nearest elevated road + 2.97 × 10 <sup>-5</sup> × commercial area, 1000 m                                                                                                                                              | 0.65                    | 0.52                      | 3.15 µg/m <sup>3</sup>                | 20              | 23.3 ± 3.1<br>[18.6 - 31.3]<br>µg/m <sup>3</sup>             |
| PM <sub>2.5</sub>            | 13.81 + 2.23 × 10 <sup>-3</sup> × road area, 50 m + 72.07 × inverse distance to the nearest major road + 9.89 × 10 <sup>-5</sup> × industrial are, 500 m + 2.22 × 10 <sup>-3</sup> × construction area, 100 m + 1.13 × 10 <sup>-5</sup> × residential area, 1000 m - 5.62 × 10 <sup>-7</sup> × river area, 5000 m                           | 0.95                    | 0.91                      | 1.75 µg/m <sup>3</sup>                | 20              | 26.0 ± 5.6<br>[17.4 - 40.6]<br>µg/m <sup>3</sup>             |
| PM <sub>2.5</sub> absorbance | 1.07 + 5.76 × 10 <sup>-6</sup> × transport building area, 100 – 500 m + 8.69 × 10 <sup>-4</sup> × road area, 25 m + 3.75 × 10 <sup>-5</sup> × transport building area, 100 m + 4.40 × 10 <sup>-6</sup> × industrial area, 500 m + 2.17 × 10 <sup>-5</sup> × length elevated road, 1000 m + 6.93 × 10 <sup>-5</sup> × commercial area, 100 m | 0.96                    | 0.92                      | 0.11 10 <sup>-5</sup> m <sup>-1</sup> | 20              | 2.0 ± 0.4<br>[1.2 - 2.6]<br>10 <sup>-5</sup> m <sup>-1</sup> |
| NO <sub>x</sub>              | 47.57 + 0.28 × length major road, 25 m - 2.91 × 10 <sup>-4</sup> × urban green area, 300 m - 3.43 × 10 <sup>-6</sup> × urban green area, 300 – 5000 m + 1.24 × 10 <sup>-3</sup> × length major road, 50 – 500 m + 5.80 × 10 <sup>-2</sup> × length major road, 25 – 50 m - 1.32 × 10 <sup>-4</sup> × natural area, 500 m                    | 0.81                    | 0.75                      | 10.70 µg/m <sup>3</sup>               | 40              | 72.4 ± 22.5<br>[21.9 - 113.0]<br>µg/m <sup>3</sup>           |
| NO <sub>2</sub>              | 20.26 + 4.11 × 10 <sup>-5</sup> × natural area, 500 m + 0.14 × length major road, 25 m + 3.60 × 10 <sup>-5</sup> × commercial-residential or industrial-residential mixing area, 500 m - 8.87 × 10 <sup>-4</sup> × urban green area, 100 m                                                                                                  | 0.74                    | 0.63                      | 6.36 µg/m <sup>3</sup>                | 40              | 48.9 ± 12.2<br>[16.7 - 75.8]<br>µg/m <sup>3</sup>            |

The R<sup>2</sup> validation refers to the leave-one-out cross validation.

**Table S2.** Spearman correlation coefficients for air pollutants and the total lengths of major roads in 25, 50, 100, and 500 buffer zones.

|                              | <b>PM<sub>10</sub></b> | <b>PM<sub>2.5-10</sub></b> | <b>PM<sub>2.5</sub></b> | <b>PM<sub>2.5</sub><br/>absorbance</b> | <b>NO<sub>x</sub></b> | <b>NO<sub>2</sub></b> | <b>MRL_25</b> | <b>MRL_50</b> | <b>MRL_100</b> | <b>MRL_500</b> |
|------------------------------|------------------------|----------------------------|-------------------------|----------------------------------------|-----------------------|-----------------------|---------------|---------------|----------------|----------------|
| PM <sub>10</sub>             | 1.00                   | 0.67                       | 0.40                    | 0.62                                   | 0.53                  | 0.53                  | 0.35          | 0.46          | 0.39           | 0.48           |
| PM <sub>2.5-10</sub>         | --                     | 1.00                       | -0.06                   | 0.43                                   | 0.34                  | 0.37                  | 0.09          | 0.15          | 0.32           | 0.60           |
| PM <sub>2.5</sub>            | --                     | --                         | 1.00                    | 0.25                                   | 0.34                  | 0.21                  | 0.28          | 0.39          | 0.28           | 0.05           |
| PM <sub>2.5</sub> absorbance | --                     | --                         | --                      | 1.00                                   | 0.50                  | 0.47                  | 0.50          | 0.40          | 0.35           | 0.40           |
| NO <sub>x</sub>              | --                     | --                         | --                      | --                                     | 1.00                  | 0.82                  | 0.61          | 0.63          | 0.56           | 0.60           |
| NO <sub>2</sub>              | --                     | --                         | --                      | --                                     | --                    | 1.00                  | 0.57          | 0.47          | 0.41           | 0.53           |
| MRL_25                       | --                     | --                         | --                      | --                                     | --                    | --                    | 1.00          | 0.80          | 0.50           | 0.13           |
| MRL_50                       | --                     | --                         | --                      | --                                     | --                    | --                    | --            | 1.00          | 0.72           | 0.18           |
| MRL_100                      | --                     | --                         | --                      | --                                     | --                    | --                    | --            | --            | 1.00           | 0.38           |
| MRL_500                      | --                     | --                         | --                      | --                                     | --                    | --                    | --            | --            | --             | 1.00           |

MRL\_25, the lengths of all major roads in a 25 m buffer; MRL\_50, the lengths of all major roads in a 50 m buffer; MRL\_100, the lengths of all major roads in a 100 m buffer; MRL\_500, the lengths of all major roads in a 500 m buffer.

**Table S3.** Associations of systolic and diastolic blood pressures with an interquartile range increment of particulate matter and nitrogen oxides.

| Exposures                    | IQR                                     | Models   | Systolic BP         | Diastolic BP        |
|------------------------------|-----------------------------------------|----------|---------------------|---------------------|
|                              |                                         |          | mm Hg (95% CI)      | mm Hg (95% CI)      |
| PM <sub>10</sub>             | 5.3 µg/m <sup>3</sup>                   | Crude    | 0.11 (-0.16, 0.39)  | 0.39 (0.24, 0.55)   |
|                              |                                         | Main     | 0.15 (-0.08, 0.38)  | 0.38 (0.23, 0.53)   |
|                              |                                         | Extended | 0.21 (-0.04, 0.45)  | 0.40 (0.24, 0.55)   |
| PM <sub>2.5-10</sub>         | 5.2 µg/m <sup>3</sup>                   | Crude    | -0.11 (-0.42, 0.19) | 0.51 (0.34, 0.69)   |
|                              |                                         | Main     | -0.03 (-0.29, 0.22) | 0.47 (0.31, 0.64)   |
|                              |                                         | Extended | -0.02 (-0.27, 0.24) | 0.47 (0.31, 0.64)   |
| PM <sub>2.5</sub>            | 4.0 µg/m <sup>3</sup>                   | Crude    | -0.01 (-0.23, 0.20) | -0.07 (-0.20, 0.05) |
|                              |                                         | Main     | 0.07 (-0.11, 0.25)  | -0.02 (-0.14, 0.09) |
|                              |                                         | Extended | 0.09 (-0.09, 0.28)  | -0.04 (-0.16, 0.08) |
| PM <sub>2.5</sub> absorbance | 0.4 (10 <sup>-5</sup> m <sup>-1</sup> ) | Crude    | -0.03 (-0.30, 0.24) | 0.30 (0.14, 0.45)   |
|                              |                                         | Main     | 0.11 (-0.11, 0.34)  | 0.28 (0.14, 0.43)   |
|                              |                                         | Extended | 0.16 (-0.08, 0.40)  | 0.29 (0.13, 0.44)   |
| NO <sub>x</sub>              | 17.5 µg/m <sup>3</sup>                  | Crude    | -0.14 (-0.37, 0.10) | 0.29 (0.15, 0.45)   |
|                              |                                         | Main     | -0.01 (-0.21, 0.19) | 0.30 (0.17, 0.42)   |
|                              |                                         | Extended | 0.04 (-0.19, 0.27)  | 0.35 (0.20, 0.49)   |
| NO <sub>2</sub>              | 6.7 µg/m <sup>3</sup>                   | Crude    | -0.03 (-0.27, 0.21) | 0.44 (0.30, 0.58)   |
|                              |                                         | Main     | 0.09 (-0.11, 0.29)  | 0.43 (0.30, 0.56)   |
|                              |                                         | Extended | 0.15 (-0.07, 0.37)  | 0.49 (0.35, 0.63)   |

The main models were calculated by generalized linear models, adjusted for sex, age, age mean-centered square, BMI, BMI mean-centered square, smoking status, alcohol consumption, education, hypertension, and diabetes. The extended models were further adjusted for traffic proximity in addition to covariates in the main models.

**Table S4.** Subgroup analyses for associations of systolic and diastolic blood pressures with increments of annual averages of particulate matter and nitrogen oxides stratified by physician-diagnosed hypertension.

| Exposures (increment)                                            | Systolic BP, mm Hg (95% CI)                 |                                                | Diastolic BP, mm Hg (95% CI)                |                                                |
|------------------------------------------------------------------|---------------------------------------------|------------------------------------------------|---------------------------------------------|------------------------------------------------|
|                                                                  | Physician-diagnosed hypertension (n=12,702) | No physician-diagnosed hypertension (n=15,050) | Physician-diagnosed hypertension (n=12,702) | No physician-diagnosed hypertension (n=15,050) |
| PM <sub>10</sub> (10 µg/m <sup>3</sup> )                         | 0.50 (-0.25, 1.25)                          | 0.18 (-0.49, 0.85)                             | 0.96 (0.57, 1.36)                           | 0.30 (-0.05, 0.64)                             |
| PM <sub>2.5-10</sub> (5 µg/m <sup>3</sup> )                      | 0.03 (-0.39, 0.46)                          | -0.08 (-0.46, 0.30)                            | 0.56 (0.33, 0.78)                           | 0.29 (0.10, 0.49)                              |
| PM <sub>2.5</sub> (5 µg/m <sup>3</sup> )                         | 0.04 (-0.34, 0.42)                          | 0.13 (-0.21, 0.48)                             | -0.02 (-0.22, 0.19)                         | -0.04 (-0.22, 0.14)                            |
| PM <sub>2.5</sub> absorbance (10 <sup>-5</sup> m <sup>-1</sup> ) | 0.11 (-0.84, 1.06)                          | 0.18 (-0.67, 1.04)                             | 0.90 (0.40, 1.40)                           | 0.34 (-0.10, 0.78)                             |
| NO <sub>x</sub> (20 µg/m <sup>3</sup> )                          | -0.09 (-0.48, 0.30)                         | 0.08 (-0.27, 0.43)                             | 0.39 (0.16, 0.62)                           | 0.31 (0.10, 0.51)                              |
| NO <sub>2</sub> (10 µg/m <sup>3</sup> )                          | 0.06 (-0.45, 0.57)                          | 0.25 (-0.21, 0.71)                             | 0.76 (0.45, 1.06)                           | 0.55 (0.28, 0.82)                              |

Generalized linear models were used, adjusted for sex, age, age mean-centered square, BMI, BMI mean-centered square, smoking status, alcohol consumption, education, and diabetes.
